# Supplementary material
Source: publisher figshare collection journal article supplement (https://acs.figshare.com/ndownloader/files/15352517)
Supplement: Supplementary file 1 [file 15352517]

**Toxicity and metabolic fate of the fungicide carbendazim in the  
typical freshwater diatom *Navicula* sp.**

Tengda Ding <sup>\*</sup>, Wen Li, Juying Li <sup>\*</sup>

Shenzhen Key Laboratory of Environmental Chemistry and Ecological Remediation, College of  
Chemistry and Environmental Engineering, Shenzhen University, Shenzhen 518060, China

\*Corresponding Author: Tengda Ding, College of Chemistry and Environmental  
Engineering, Shenzhen University, Shenzhen 518060, China

E-mail: [dingtengda@szu.edu.cn](mailto:dingtengda@szu.edu.cn)

Juying Li, College of Chemistry and Environmental Engineering, Shenzhen  
University, Shenzhen 518060, China

E-mail: [jyli@szu.edu.cn](mailto:jyli@szu.edu.cn)

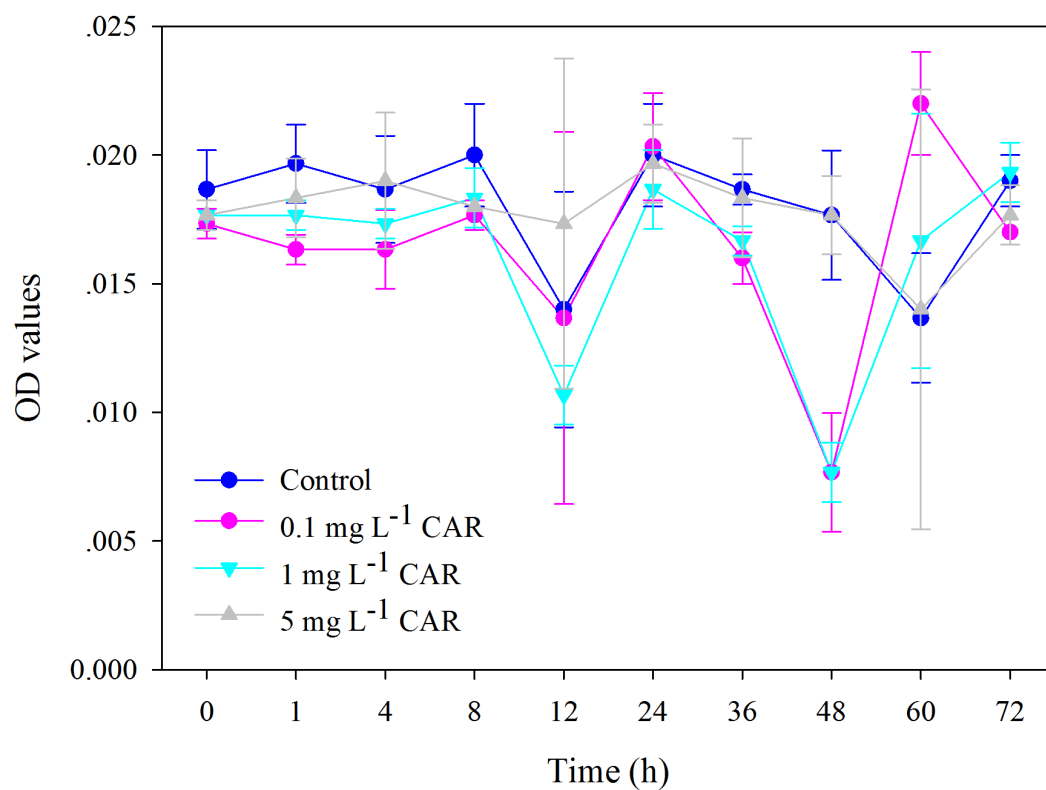

**Figure S1** The variations of algal growth rate under the CAR exposure at different incubation time

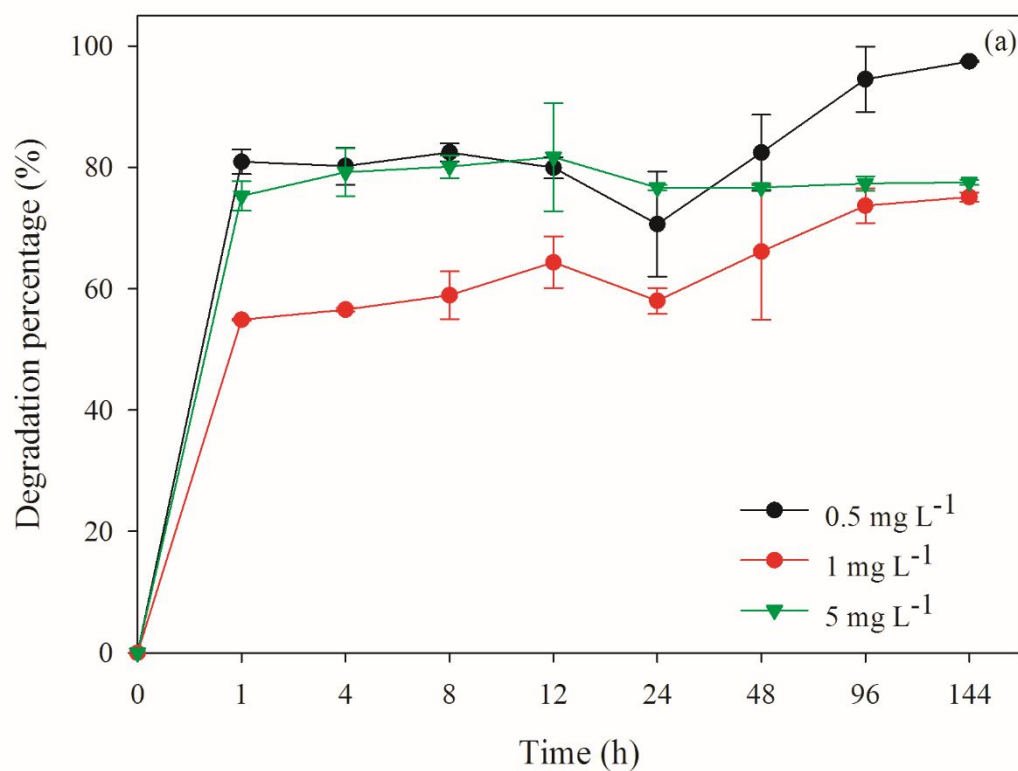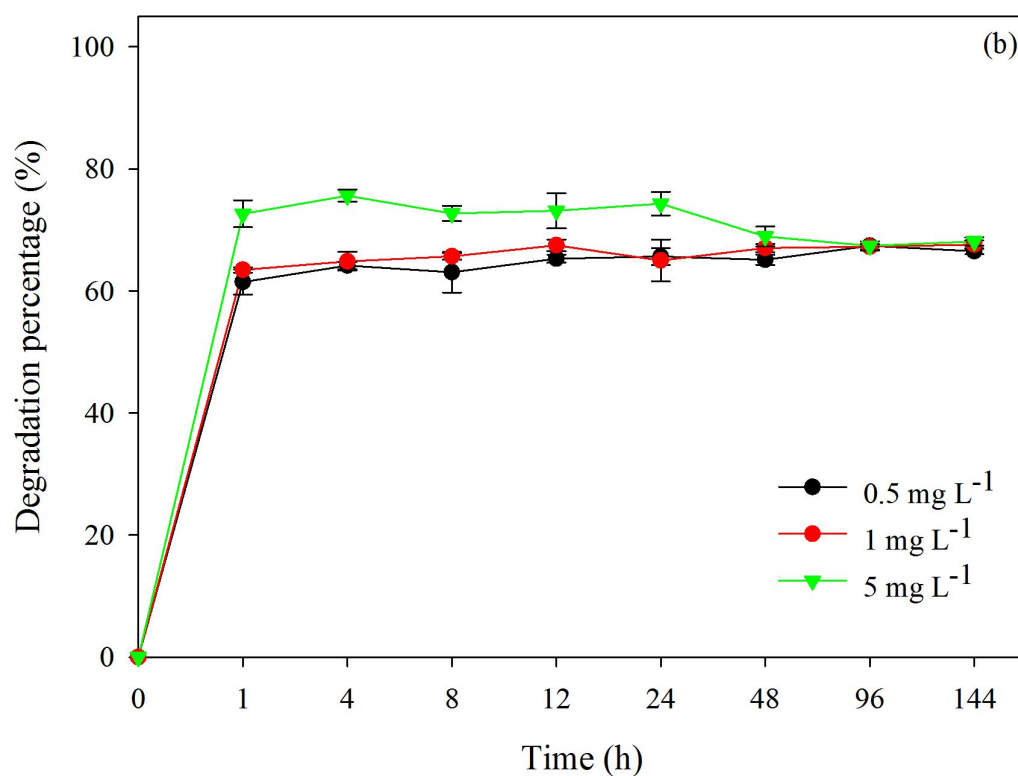

**Figure S2** The degradation percentage of CAR in pure medium (a) and *Navicula* sp. culutres (b) during the incubation time

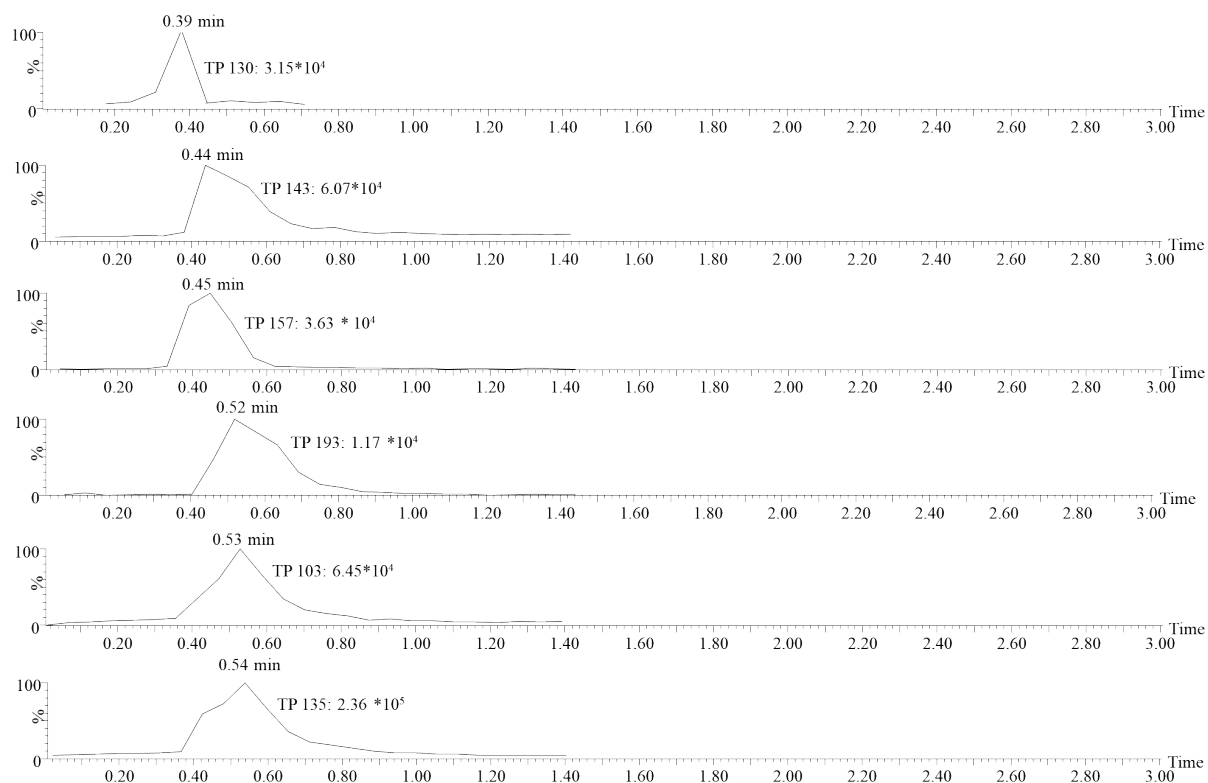

**Figure S3** Chromatograms of CAR metabolites in *Navicula* sp. cultures with initial CAR concentration of  $500 \mu\text{g L}^{-1}$

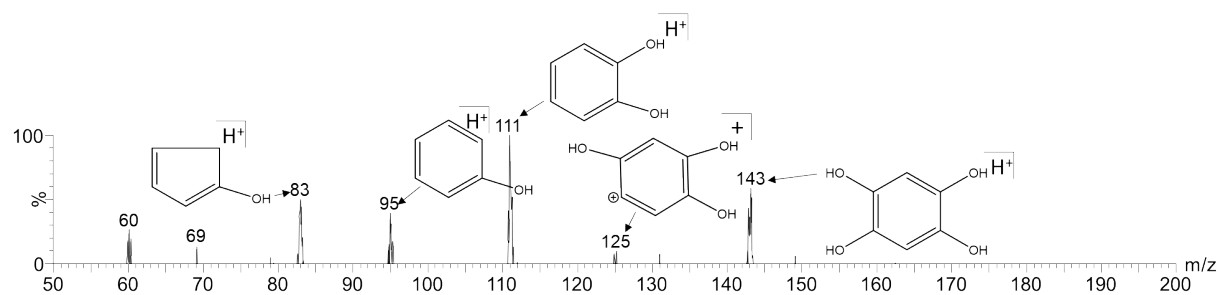

**Figure S4** MS spectra in the identification process of TP 143 in *Navicula* sp.

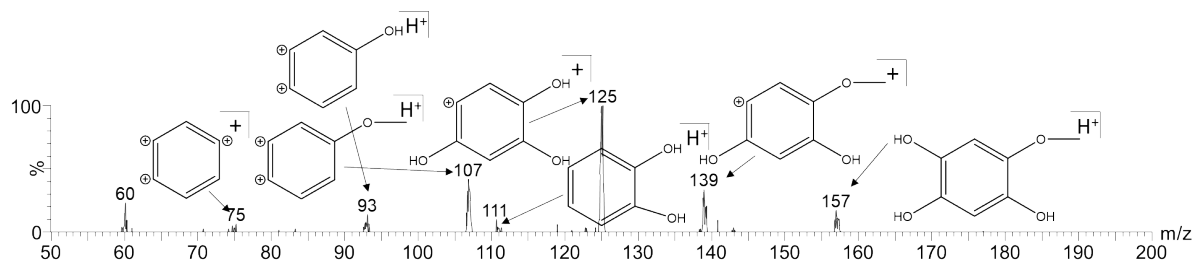

**Figure S5** MS spectra in the identification process of TP 157 in *Navicula* sp.

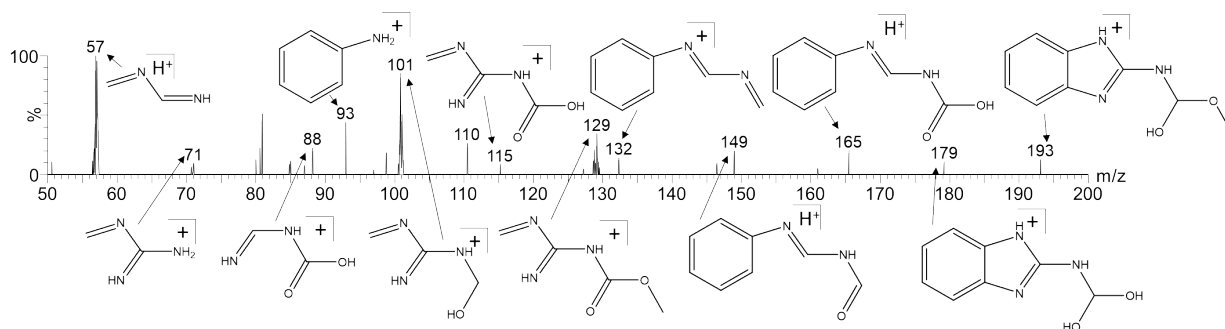

**Figure S6** MS spectra in the identification process of TP 193 in *Navicula* sp.

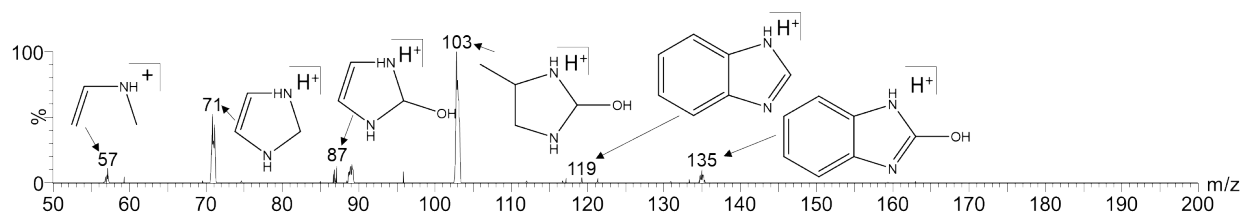

**Figure S7** MS spectra in the identification process of TP 135 in *Navicula* sp.

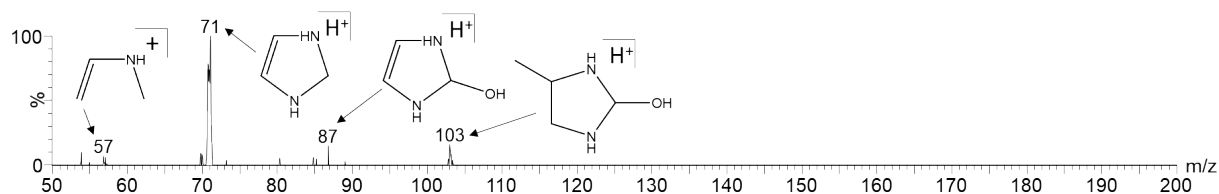

**Figure S8** MS spectra in the identification process of TP 103 in *Navicula* sp.

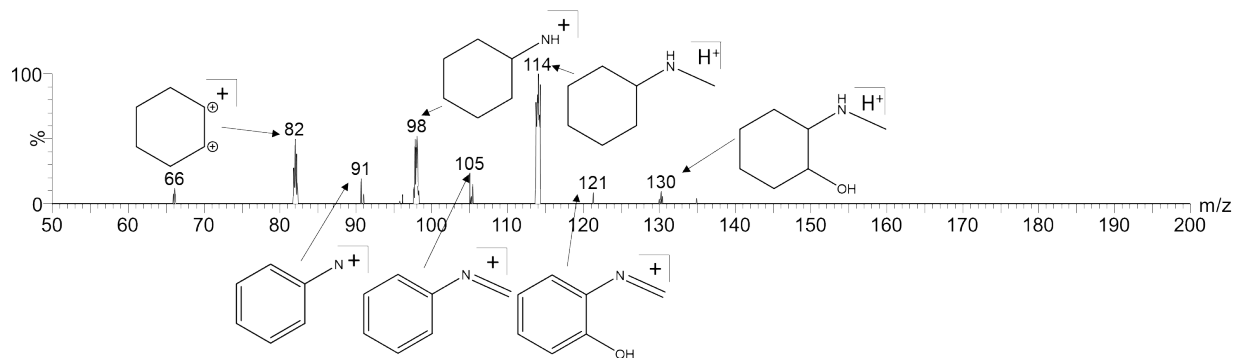

**Figure S9** MS spectra in the identification process of TP 130 in D1 medium

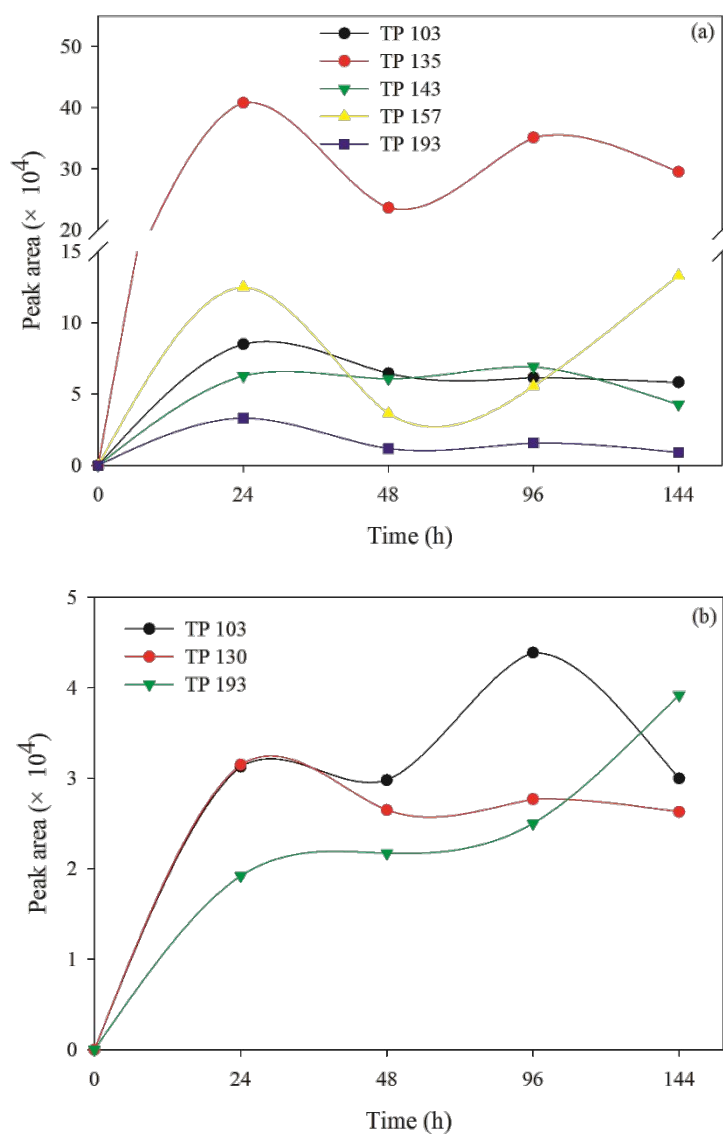

**Figure S10** The peak area kinetics of CAR metabolites in *Navicula* sp. cells (a) and D1 medium (b) during 144 h of incubation
